# Supplementary material for: Are women underrepresented in cerebrovascular disease clinical trials? A systematic review using the FDA database
Source: bioRxiv or medRxiv preprint supplement (doi:10.1101/2020.11.09.20227207), 2020-11-12
Supplement: Supplementary file [file media-1.pdf]

Supplementary Material

Table I. Diseases and conditions under the diagnosis codes for CVD

| Diagnosis code | Classification of disease                                                            |
|----------------|--------------------------------------------------------------------------------------|
| ICD-9: 430     | Subarachnoid hemorrhage                                                              |
| ICD-9: 431     | Intracerebral hemorrhage                                                             |
| ICD-9: 432     | Other and unspecified intracranial hemorrhage                                        |
| ICD-9: 433     | Occlusion and stenosis of precerebral arteries                                       |
| ICD-9: 434     | Occlusion of cerebral arteries                                                       |
| ICD-9: 435     | Transient cerebral ischemia                                                          |
| ICD-9: 436     | Acute, but ill-defined, cerebrovascular disease                                      |
| ICD-9: 437     | Other and ill-defined cerebrovascular disease                                        |
| ICD-9: 438     | Late effects of cerebrovascular disease                                              |
| ICD-10: I60    | Nontraumatic subarachnoid hemorrhage                                                 |
| ICD-10: I61    | Nontraumatic intracerebral hemorrhage                                                |
| ICD-10: I62    | Other and unspecified nontraumatic intracranial hemorrhage                           |
| ICD-10: I63    | Cerebral infarction                                                                  |
| ICD-10: I65    | Occlusion and stenosis of precerebral arteries, not resulting in cerebral infarction |
| ICD-10: I66    | Occlusion and stenosis of cerebral arteries, not resulting in cerebral infarction    |
| ICD-10: I67    | Other cerebrovascular diseases                                                       |
| ICD-10: I68    | Cerebrovascular disorders in diseases classified elsewhere                           |
| ICD-10: I69    | Sequelae of cerebrovascular disease                                                  |

The ICD-9 and ICD-10 codes for CVD were based on the *Heart Disease and Stroke Statistics* annual report.
