# Supplementary material for: Are women underrepresented in cerebrovascular disease clinical trials? A systematic review using the FDA database
Source: bioRxiv or medRxiv preprint supplement (doi:10.1101/2020.11.09.20227207), 2020-11-12
Supplement: Supplementary file [file media-2.pdf]

Supplementary Material

Table II. Prevalence of CVD among patients of age≥18 years by gender (females vs. males) in the United States between 2002 and 2017

| Year | Female           |                              |                                      | Male                         |                              |                         | Overall         |                 |                        | Ratio of women to men among CVD patients |
|------|------------------|------------------------------|--------------------------------------|------------------------------|------------------------------|-------------------------|-----------------|-----------------|------------------------|------------------------------------------|
|      | Population size* | Prevalence rate <sup>†</sup> | Estimated N of patients <sup>‡</sup> | Population size <sup>1</sup> | Prevalence rate <sup>2</sup> | Estimated N of patients | Population size | Prevalence rate | Estimate N of patients |                                          |
| 2002 | 108712           | 2.5%                         | 2717.80                              | 100610                       | 2.5%                         | 2515.25                 | 209322          | 2.5%            | 5233.05                | 1.08:1                                   |
| 2003 | 110190           | 2.5%                         | 2754.75                              | 102431                       | 2.5%                         | 2560.78                 | 212621          | 2.5%            | 5315.53                | 1.08:1                                   |
| 2004 | 110883           | 2.5%                         | 2772.08                              | 103641                       | 2.5%                         | 2591.03                 | 214524          | 2.5%            | 5363.10                | 1.07:1                                   |
| 2005 | 112409           | 2.6%                         | 2922.63                              | 104966                       | 2.5%                         | 2624.15                 | 217375          | 2.6%            | 5546.78                | 1.11:1                                   |
| 2006 | 113503           | 2.6%                         | 2951.08                              | 106346                       | 2.5%                         | 2658.65                 | 219849          | 2.6%            | 5609.73                | 1.11:1                                   |
| 2007 | 114880           | 2.8%                         | 3216.64                              | 107843                       | 2.6%                         | 2803.92                 | 222723          | 2.7%            | 6020.56                | 1.15:1                                   |
| 2008 | 115842           | 2.5%                         | 2896.05                              | 108863                       | 2.7%                         | 2939.30                 | 224705          | 2.6%            | 5835.35                | 0.99:1                                   |
| 2009 | 116946           | 2.5%                         | 2923.65                              | 110027                       | 2.7%                         | 2970.73                 | 226973          | 2.6%            | 5894.38                | 0.98:1                                   |
| 2010 | 118079           | 2.5%                         | 2951.98                              | 111163                       | 2.7%                         | 3001.40                 | 229242          | 2.6%            | 5953.38                | 0.98:1                                   |
| 2011 | 118892           | 2.5%                         | 2972.30                              | 112301                       | 2.7%                         | 3032.13                 | 231193          | 2.6%            | 6004.43                | 0.98:1                                   |
| 2012 | 121442           | 2.6%                         | 3157.49                              | 113279                       | 2.6%                         | 2945.25                 | 234721          | 2.6%            | 6102.75                | 1.07:1                                   |
| 2013 | 122481           | 2.6%                         | 3184.51                              | 114448                       | 2.7%                         | 3090.10                 | 236929          | 2.6%            | 6274.60                | 1.03:1                                   |
| 2014 | 129959           | 2.9%                         | 3768.81                              | 115880                       | 2.9%                         | 3360.52                 | 245839          | 2.9%            | 7129.33                | 1.07:1                                   |
| 2015 | 125196           | 2.7%                         | 3380.29                              | 117051                       | 2.7%                         | 3160.38                 | 242247          | 2.7%            | 6540.67                | 1.07:1                                   |
| 2016 | 126338           | 2.7%                         | 3411.13                              | 118468                       | 2.7%                         | 3198.64                 | 244806          | 2.7%            | 6609.76                | 1.07:1                                   |
| 2017 | 127156           | 2.8%                         | 3560.37                              | 119168                       | 2.8%                         | 3336.70                 | 246324          | 2.8%            | 6897.07                | 1.07:1                                   |
| 2018 | 128488           | 2.7%                         | 3469.18                              | 120708                       | 2.7%                         | 3259.12                 | 249196          | 2.7%            | 6728.29                | 1.06:1                                   |
| 2019 | 129262           | 2.8%                         | 3619.34                              | 121300                       | 2.9%                         | 3517.70                 | 250562          | 2.8%            | 7137.04                | 1.03:1                                   |

\*The population sizes (numbers in 1000s) were obtained from the data released by the US Census Bureau (<https://www.census.gov>).

<sup>†</sup>The prevalence rates were based on the *Heart Disease and Stroke Statistics* annually updated report from *Circulation*.

<sup>‡</sup>The estimated number N of patients was calculated as the population multiplied by the prevalence rate.
