# Supplementary material for: Are women underrepresented in cerebrovascular disease clinical trials? A systematic review using the FDA database
Source: bioRxiv or medRxiv preprint supplement (doi:10.1101/2020.11.09.20227207), 2020-11-12

## Supplementary Material

Figure I: Selection of study trials in FDA database

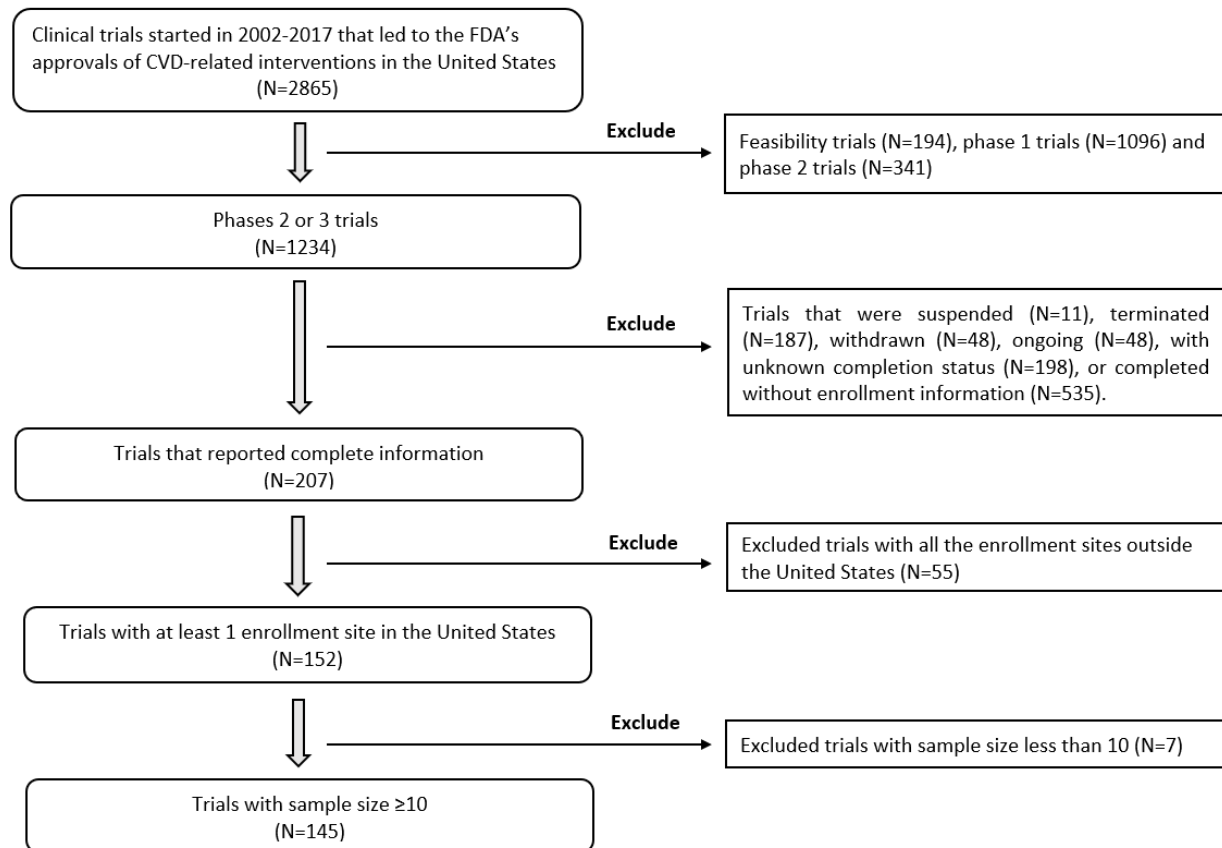

Supplement: Supplementary file [file media-3.pdf]
